# Supplementary material for: Reversible nonvolatile control of the anomalous valley Hall effect in two-dimensional multiferroic materials based on GdGe2
Source: Royal Society of Chemistry journal article supplement (doi:10.1039/d4tc00115j), 2024-01-01
Supplement: d4tc00115j1.pdf [file d4tc00115j1.pdf]

## Supporting Information

# Reversible nonvolatile control of anomalous valley Hall effect in two-dimensional multiferroic materials based on $\text{GdGe}_2$

Xuhong Li<sup>1</sup>, Jiawei Li<sup>2</sup>, Zhihao Gao<sup>1</sup>, Ziyu Niu<sup>1</sup>, Xinyue Bi<sup>1</sup>, Jinwei Gao<sup>1</sup>, Tengfei Cao<sup>1</sup> and Xiaoli Fan<sup>1\*</sup>

<sup>1</sup> State Key Laboratory of Solidification Processing, Center for Advanced Lubrication and Seal Materials, School of Material Science and Engineering, Northwestern Polytechnical University, 127 YouYi Western Road, Xi'an, Shaanxi 710072, China.

<sup>2</sup> Queen Mary University of London Engineering School, Northwestern Polytechnical University, 127 YouYi Western Road, Xi'an, Shaanxi 710072, China

\*Corresponding author: xlfan@nwpu.edu.cn

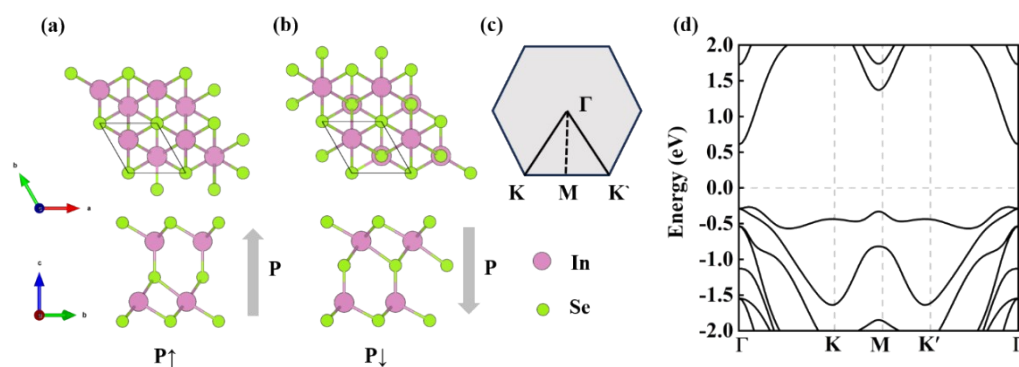

**Figure S1.** Top and side views for the atomic structures of monolayer  $\text{In}_2\text{Se}_3$  with the electric polarization along (a) upward ( $\text{In}_2\text{Se}_3^\uparrow$ ) and (b) downward ( $\text{In}_2\text{Se}_3^\downarrow$ ) direction. The black rhombi marks the unit cell. (c) First Brillouin zone of monolayer  $\text{GdGe}_2$  and  $\text{In}_2\text{Se}_3$  marking with the high symmetric points. (d) Electronic band structure of monolayer  $\text{In}_2\text{Se}_3$ .

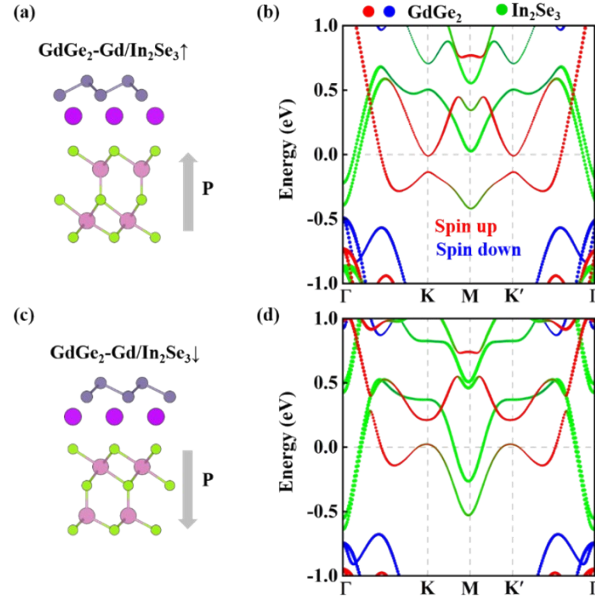

**Figure S2.** Side views for the atomic structures of  $\text{GdGe}_2/\text{In}_2\text{Se}_3$  heterojunction with the Gd atomic layer of  $\text{GdGe}_2$  at the interface and electric polarization of  $\text{In}_2\text{Se}_3$  along the direction pointing (a) toward ( $\text{GdGe}_2\text{-Gd}/\text{In}_2\text{Se}_3\uparrow$ ) and (c) backward ( $\text{GdGe}_2\text{-Gd}/\text{In}_2\text{Se}_3\downarrow$ ) the  $\text{GdGe}_2$  monolayer. Electronic band structures of (b)  $\text{GdGe}_2\text{-Gd}/\text{In}_2\text{Se}_3\uparrow$  and (d)  $\text{GdGe}_2\text{-Gd}/\text{In}_2\text{Se}_3\downarrow$  heterojunctions without considering the spin orbit coupling (SOC).

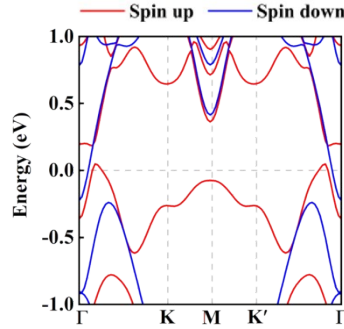

**Figure S3.** Electronic band structure of  $\text{GdGe}_2\text{-Gd}/\text{In}_2\text{Se}_3\downarrow$  heterojunction calculated using the HSE method.

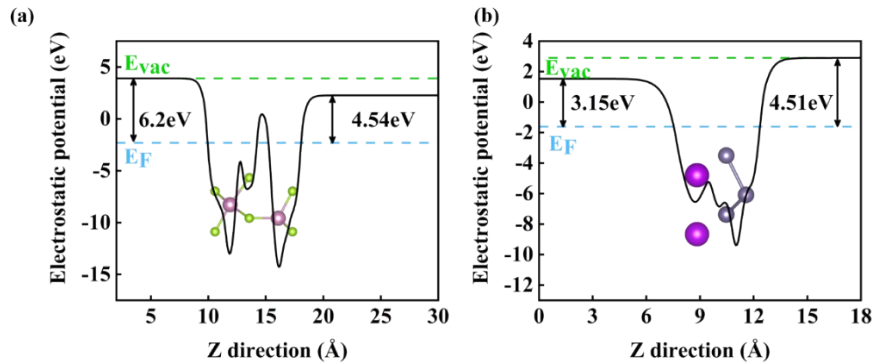

**Figure S4.** The evolution of the xy-plane-averaged electrostatic potential along z direction for monolayer (a)  $\text{In}_2\text{Se}_3$  and (b)  $\text{GdGe}_2$ .  $E_{\text{vac}}$  represents the vacuum energy level, and  $E_{\text{F}}$  represents the Fermi energy level.

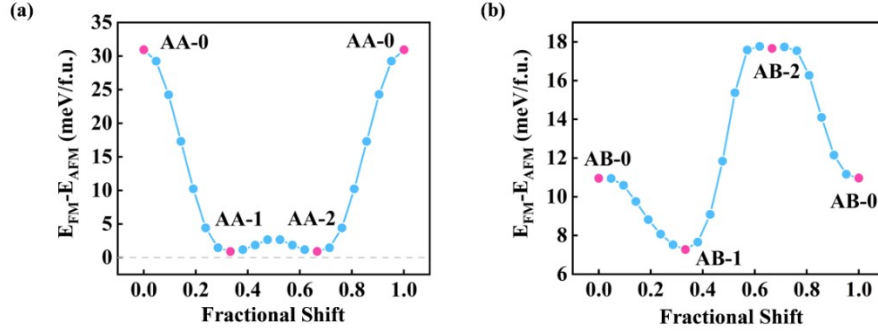

**Figure S5.** Evolution of the interlayer magnetic exchange energy of bilayer GdGe<sub>2</sub> with respect to the in-plane translation of the top GdGe<sub>2</sub> monolayer along the  $[\bar{1}10]$  direction starting from (a) the AA-0 and (b) the AB-0 stacking.

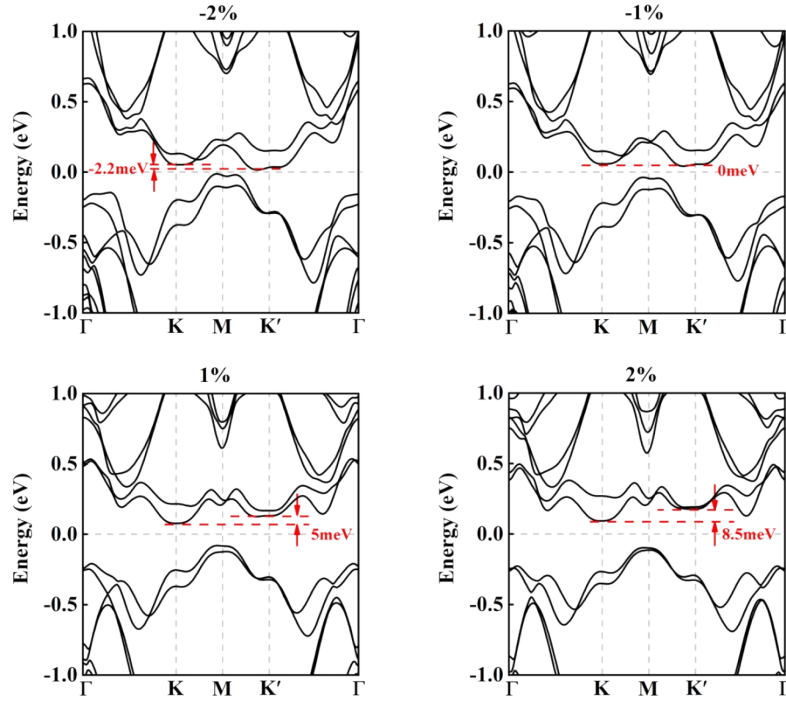

**Figure S6.** Electronic band structures of AA-2 stacking under the biaxial strain of -2 ~ 2% with considering the spin orbital coupling (SOC).

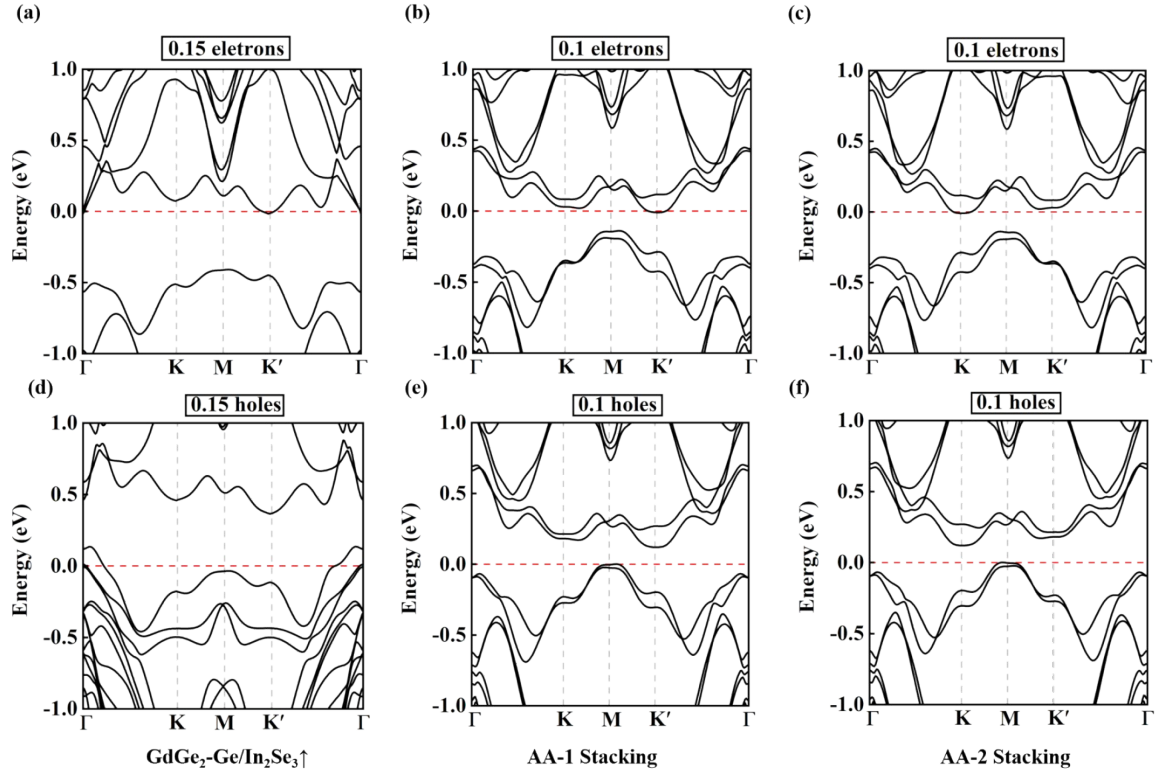

**Figure S7.** Electronic band structures of (a)  $\text{GdGe}_2\text{-Ge/In}_2\text{Se}_3\uparrow$  with 0.15 electrons doping, (b) AA-1 stacking bilayer  $\text{GdGe}_2$  with 0.1 electrons doping, (c) AA-2 stacking bilayer  $\text{GdGe}_2$  with 0.1 electrons doping. Electronic band structures of (d)  $\text{GdGe}_2\text{-Ge/In}_2\text{Se}_3\uparrow$ , (e) AA-1 stacking bilayer  $\text{GdGe}_2$ , and (f) AA-2 stacking bilayer  $\text{GdGe}_2$  with 0.1 holes doping.

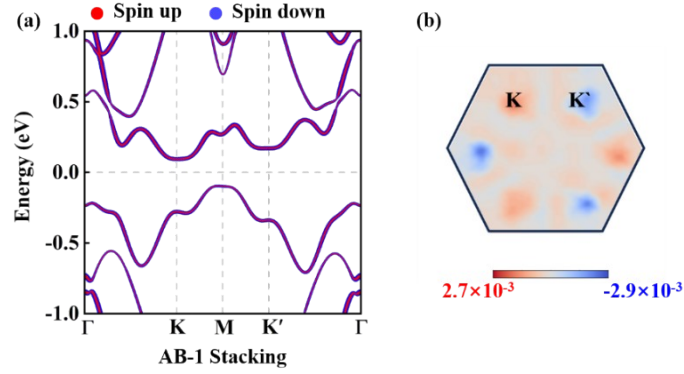

**Figure S8.** (a) Electronic band structures of AB-1 stacking bilayer  $\text{GdGe}_2$  with considering the spin orbital coupling (SOC). (c) Berry curvatures of AB-1 stacking bilayer  $\text{GdGe}_2$  in the whole 2D Brillouin zone.
